# Supplementary material for: The Diversity and Evolution of Sex Chromosomes in Frogs
Source: MDPI journal article supplement (doi:10.3390/genes12040483), 2021-03-26
Supplement: s1 [file s1]

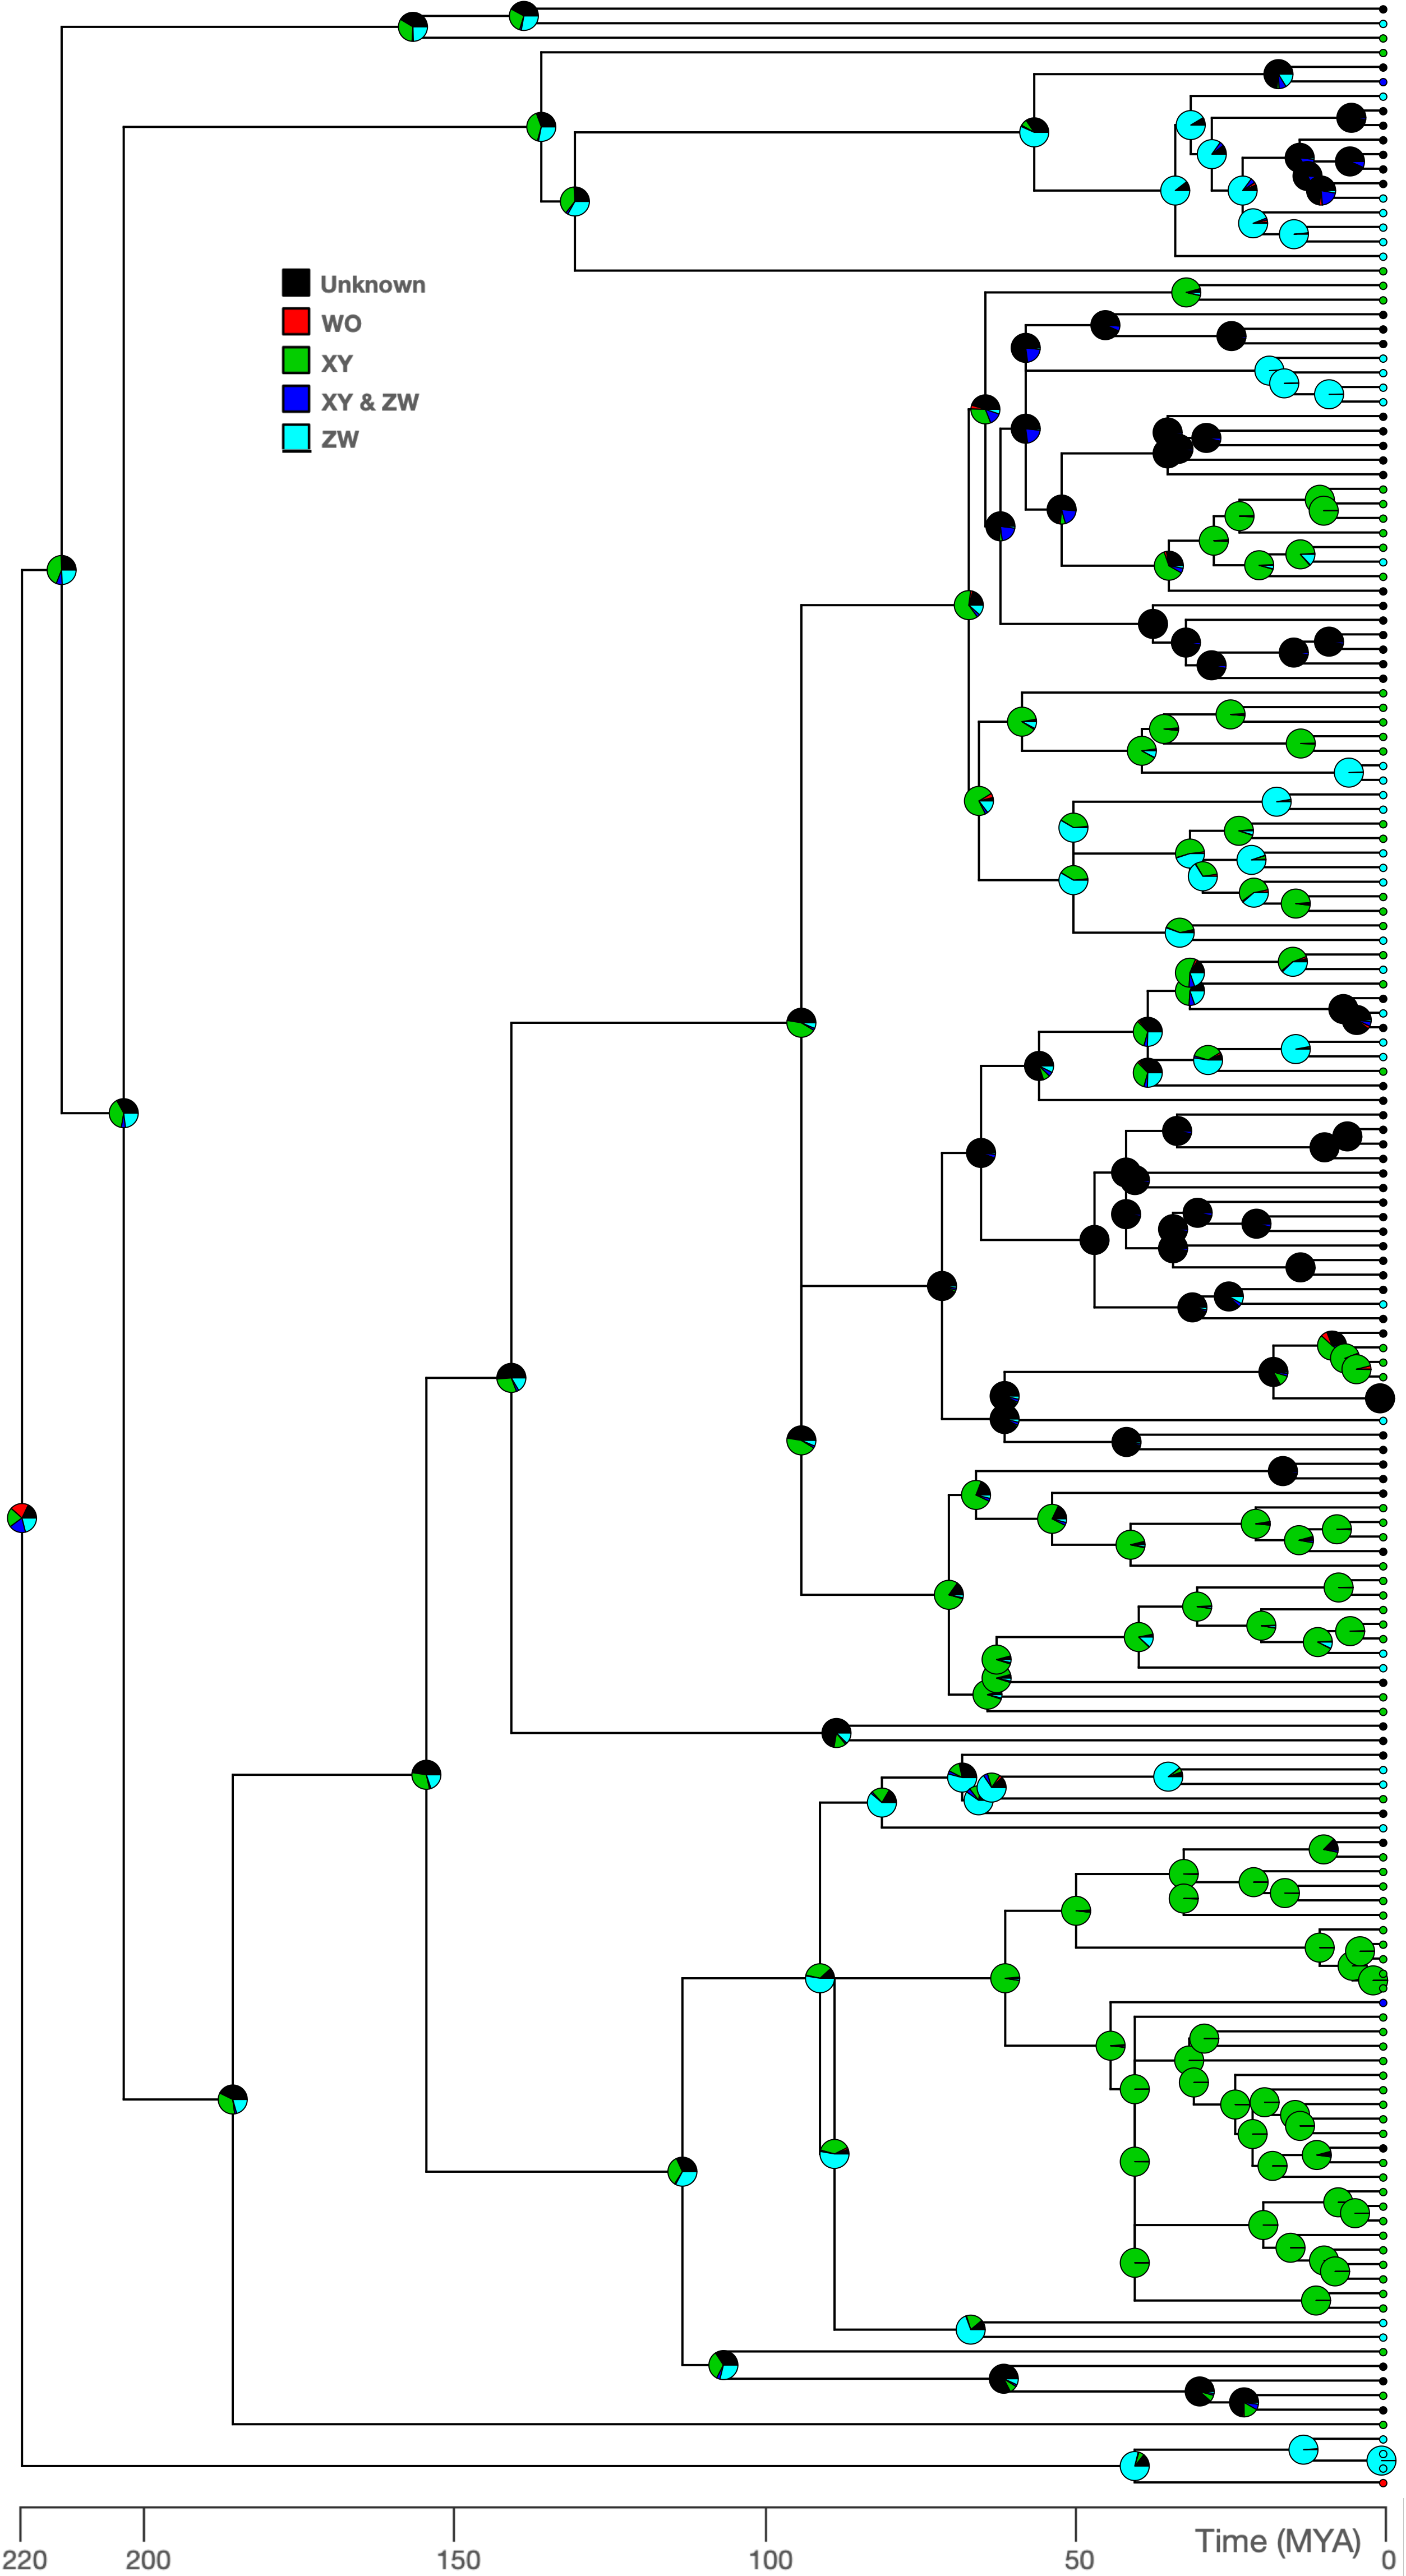

Unknown  
WO  
XY  
XY & ZW  
ZW

- Alytes obstetricans
- Discoglossus pictus
- Bombina orientalis
- Pipa parva
- Xenopus epitropicalis
- Xenopus tropicalis
- Xenopus clivii
- Xenopus amietii
- Xenopus ruwenzoriensis
- Xenopus wittei
- Xenopus pygmaeus
- Xenopus fraseri
- Xenopus boumbaensis
- Xenopus andrei
- Xenopus vestitus
- Xenopus gilli
- Xenopus laevis
- Xenopus borealis
- Hymenochirus boettgeri
- Phasmahyla exilis
- Phyllomedusa rohdei
- Scinax catharinae
- Scinax ruber
- Scinax fuscovarius
- Pseudis minuta
- Pseudis paradoxa
- Pseudis tocantins
- Pseudis fusca
- Phyllodytes luteolus
- Corythomantis greeningi
- Aparasphenodon bruni
- Trachycephalus mesophaeus
- Itapothyla langsdorffii
- Hyla arborea
- Hyla molleri
- Hyla orientalis
- Hyla meridionalis
- Hyla japonica
- Hyla suweonensis
- Hyla femoralis
- Smilisca baudinii
- Hypsiobas albomarginatus
- Hypsiobas semilineatus
- Hypsiobas guentheri
- Hypsiobas bischoffi
- Hypsiobas polytaenus
- Hypsiobas raniceps
- Strabomantis biporcatus
- Pristimantis unistrigatus
- Pristimantis pulvinatus
- Pristimantis curtipes
- Pristimantis duellmani
- Pristimantis euphronides
- Pristimantis shrevei
- Eleutherodactylus cuneatus
- Eleutherodactylus turquensis
- Eleutherodactylus oxyrhynchus
- Eleutherodactylus heminota
- Eleutherodactylus albipes
- Eleutherodactylus emiliae
- Eleutherodactylus casparii
- Eleutherodactylus cundalli
- Eleutherodactylus cavernicola
- Eleutherodactylus johnstonei
- Eleutherodactylus glamyrus
- Bufo siculus
- Bufo viridis
- Bufo raddei
- Rhinella arenarum
- Rhinella marina
- Rhinella schneideri
- Bufo gargarizans
- Bufo bufo
- Duttaphrynus melanostictus
- Epidalea calamita
- Colostethus fraterdanieli
- Ameerega picta
- Ameerega hahneli
- Ameerega flavopicta
- Hyloxalus subpunctatus
- Hyloxalus vertebralis
- Oophaga pumilio
- Adelphobates castaneotinctus
- Adelphobates quinquevittatus
- Andinobates minutus
- Dendrobates tinctorius
- Dendrobates truncatus
- Allobates talamancae
- Allobates femoralis
- Allobates brunneus
- Eupsophus calcaratus
- Eupsophus roseus
- Eupsophus insularis
- Eupsophus migueli
- Eupsophus emiliopugini
- Eupsophus vertebralis
- Proceratophrys boiei
- Hylodes phyllodes
- Crossodactylus caramaschii
- Flectonotus pygmaeus
- Flectonotus fitzgeraldi
- Stefania scalae
- Gastrotheca riobambae
- Gastrotheca peruana
- Gastrotheca pseustes
- Gastrotheca gracilis
- Gastrotheca walkeri
- Engystomops freibergi
- Engystomops petersi
- Engystomops pustulatus
- Engystomops randi
- Engystomops montubio
- Engystomops coloradum
- Pseudopaludicola falcipes
- Leptodactylus pentadactylus
- Vitreorana antisthenesi
- Cirinia deserticola
- Neobatrachus sudelli
- Occidozygia laevis
- Hoplobatrachus tigerinus
- Euphyllis cyanophlyctis
- Fejervarya limnocharis
- Limnonectes kuhlii
- Buergeria buergeri
- Pelophylax chosonicus
- Pelophylax porosus
- Pelophylax perezi
- Pelophylax ridibundus
- Pelophylax saharicus
- Pelophylax esculentus
- Amolops lifanensis
- Amolops loloensis
- Amolops kangtingensis
- Amolops mantzorum
- Amolops jinjiangensis
- Rugosa rugosa
- Odorrana narina
- Rana latastei
- Rana tsushimensis
- Rana tagoi
- Rana dalmatina
- Rana japonica
- Rana temporaria
- Rana iberica
- Rana italica
- Rana dybowskii
- Rana kukunoris
- Rana arvalis
- Rana pipiens
- Rana chiricahuensis
- Rana montezumae
- Rana yavapaiensis
- Rana blairi
- Rana sphenocephala
- Rana berlandieri
- Rana catesbeiana
- Rana clamitans
- Tomopterna delalandii
- Pyxicephalus adspersus
- Hyperolius viridiflavus
- Kaloula picta
- Microhyla pulchra
- Microhyla fissipes
- Microhyla heymonsi
- Pelodytes punctatus
- Leiopelma archeyi
- Leiopelma hamiltoni
- Leiopelma pakeka
- Leiopelma hochstetteri
