# Supplementary figures and images for: The Diversity and Evolution of Sex Chromosomes in Frogs
Source: MDPI journal article supplement (doi:10.3390/genes12040483), 2021-03-26

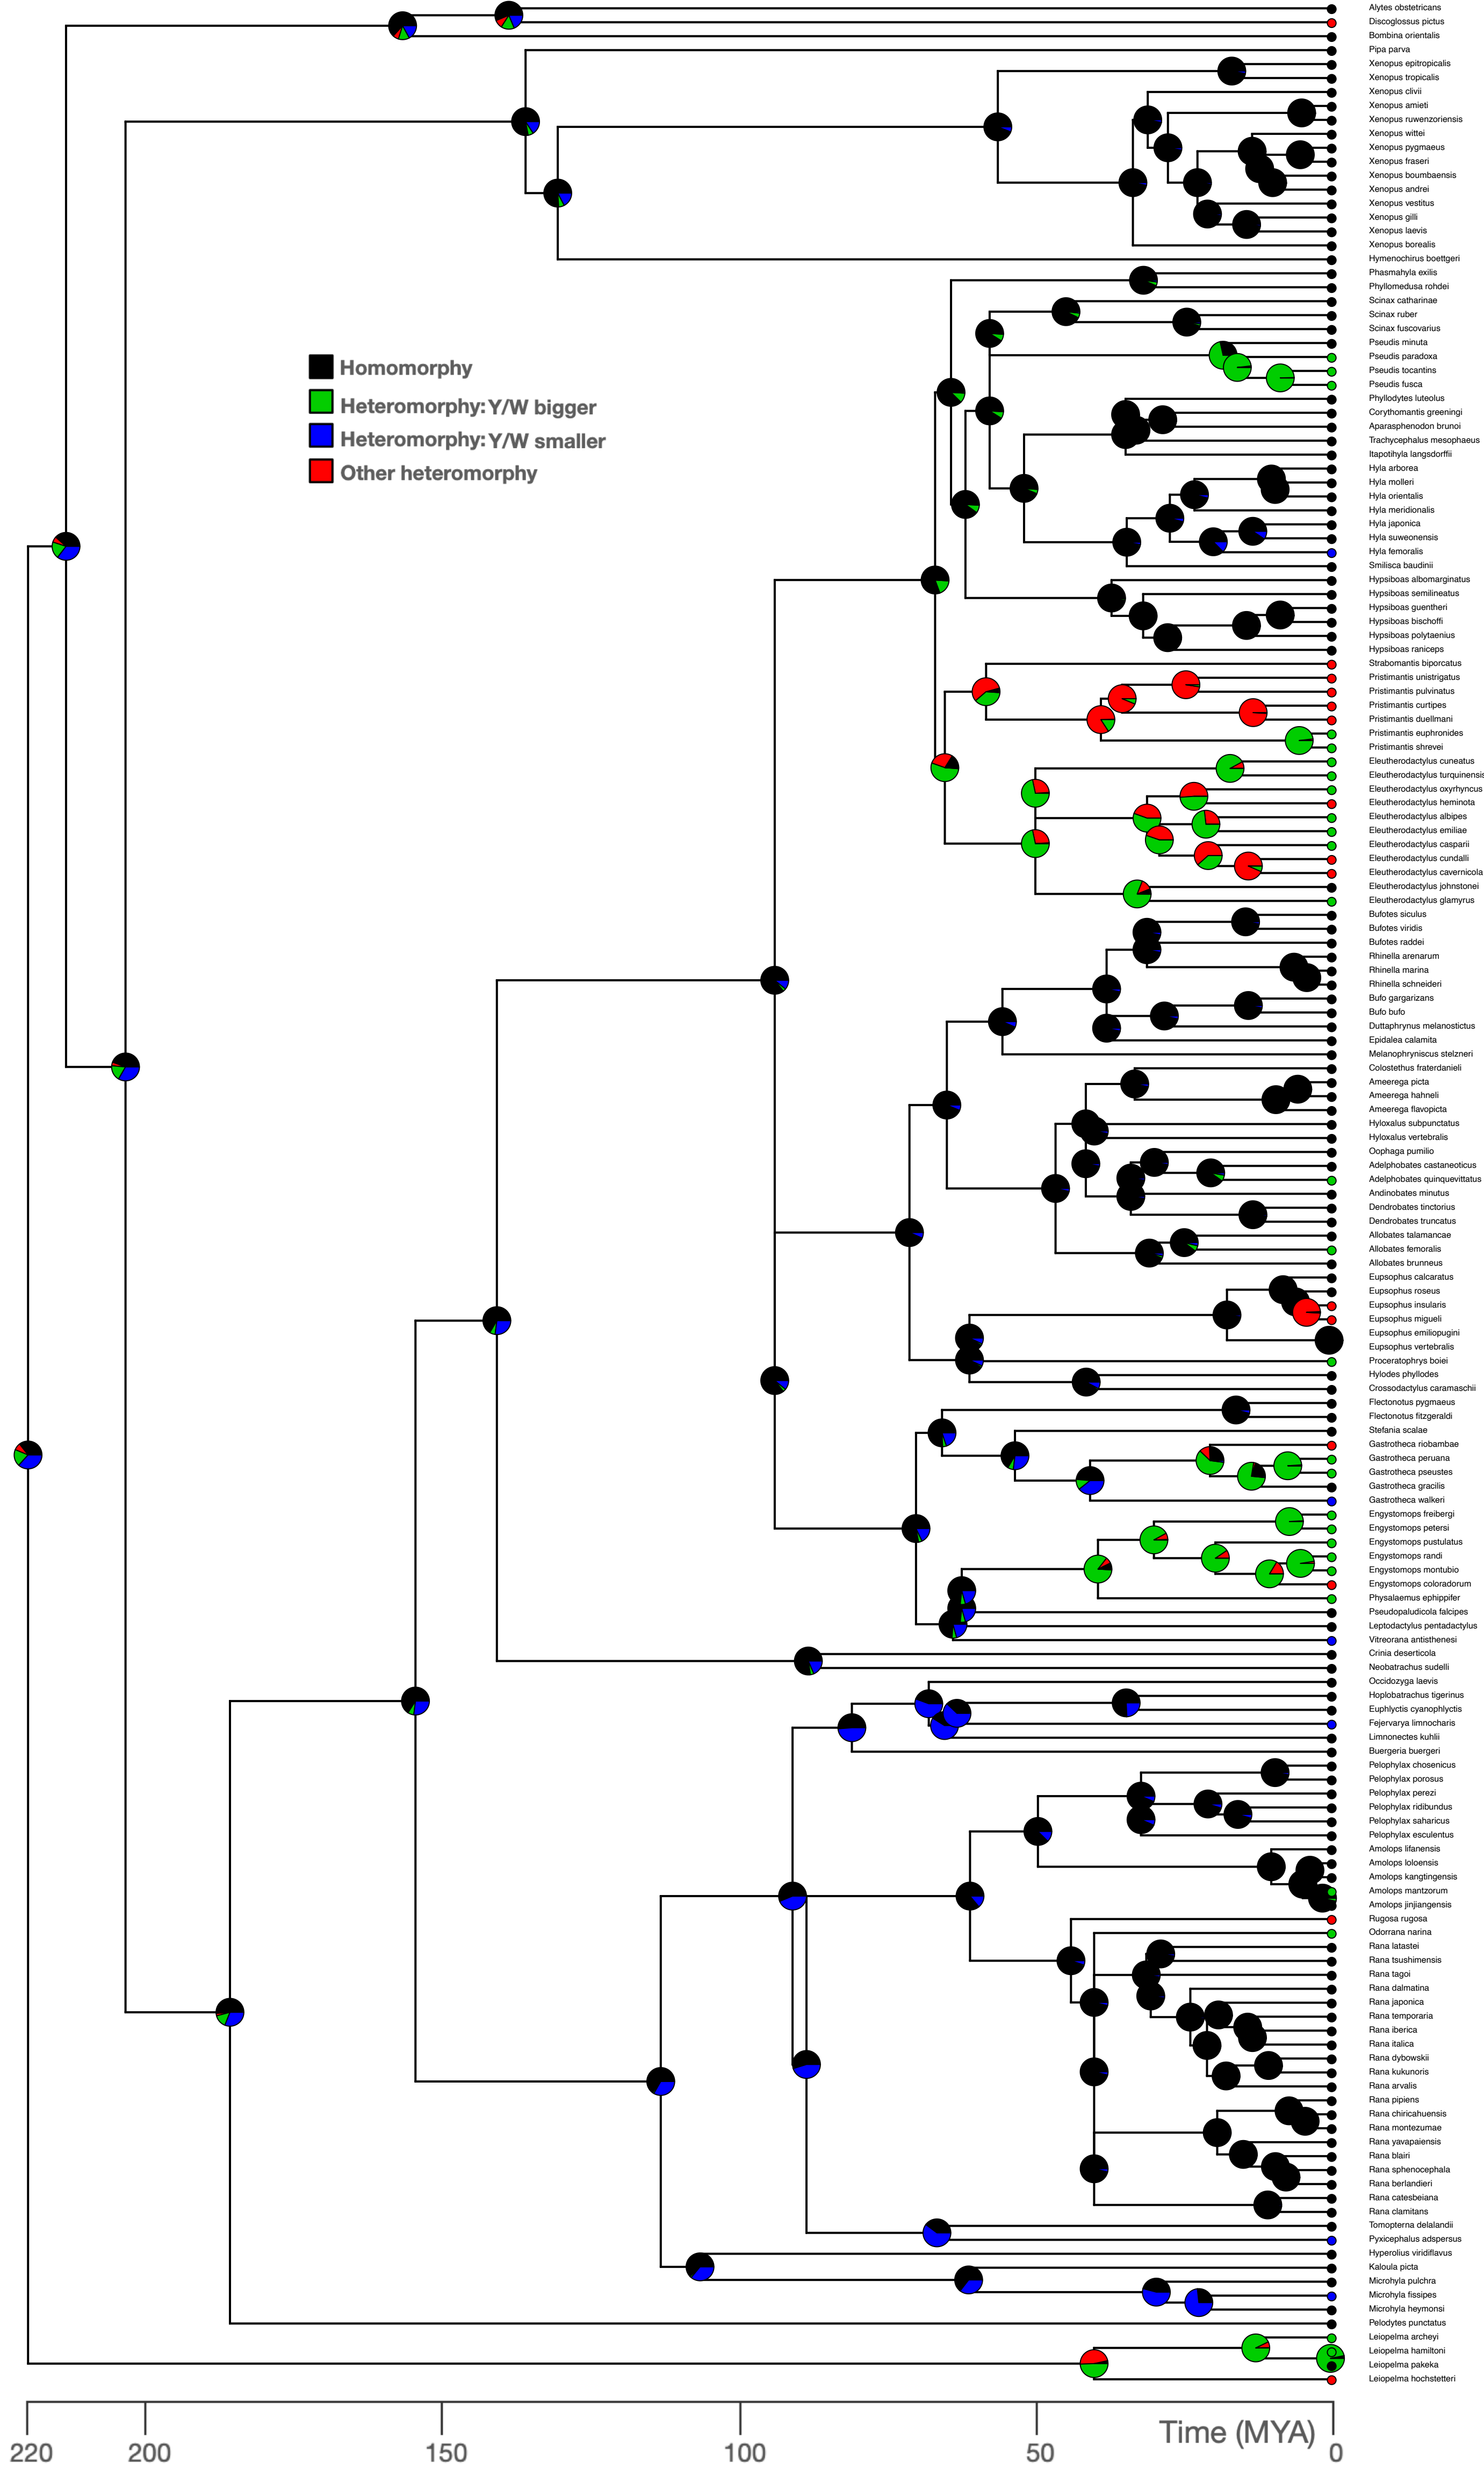

Supplement: s1 [file s1]

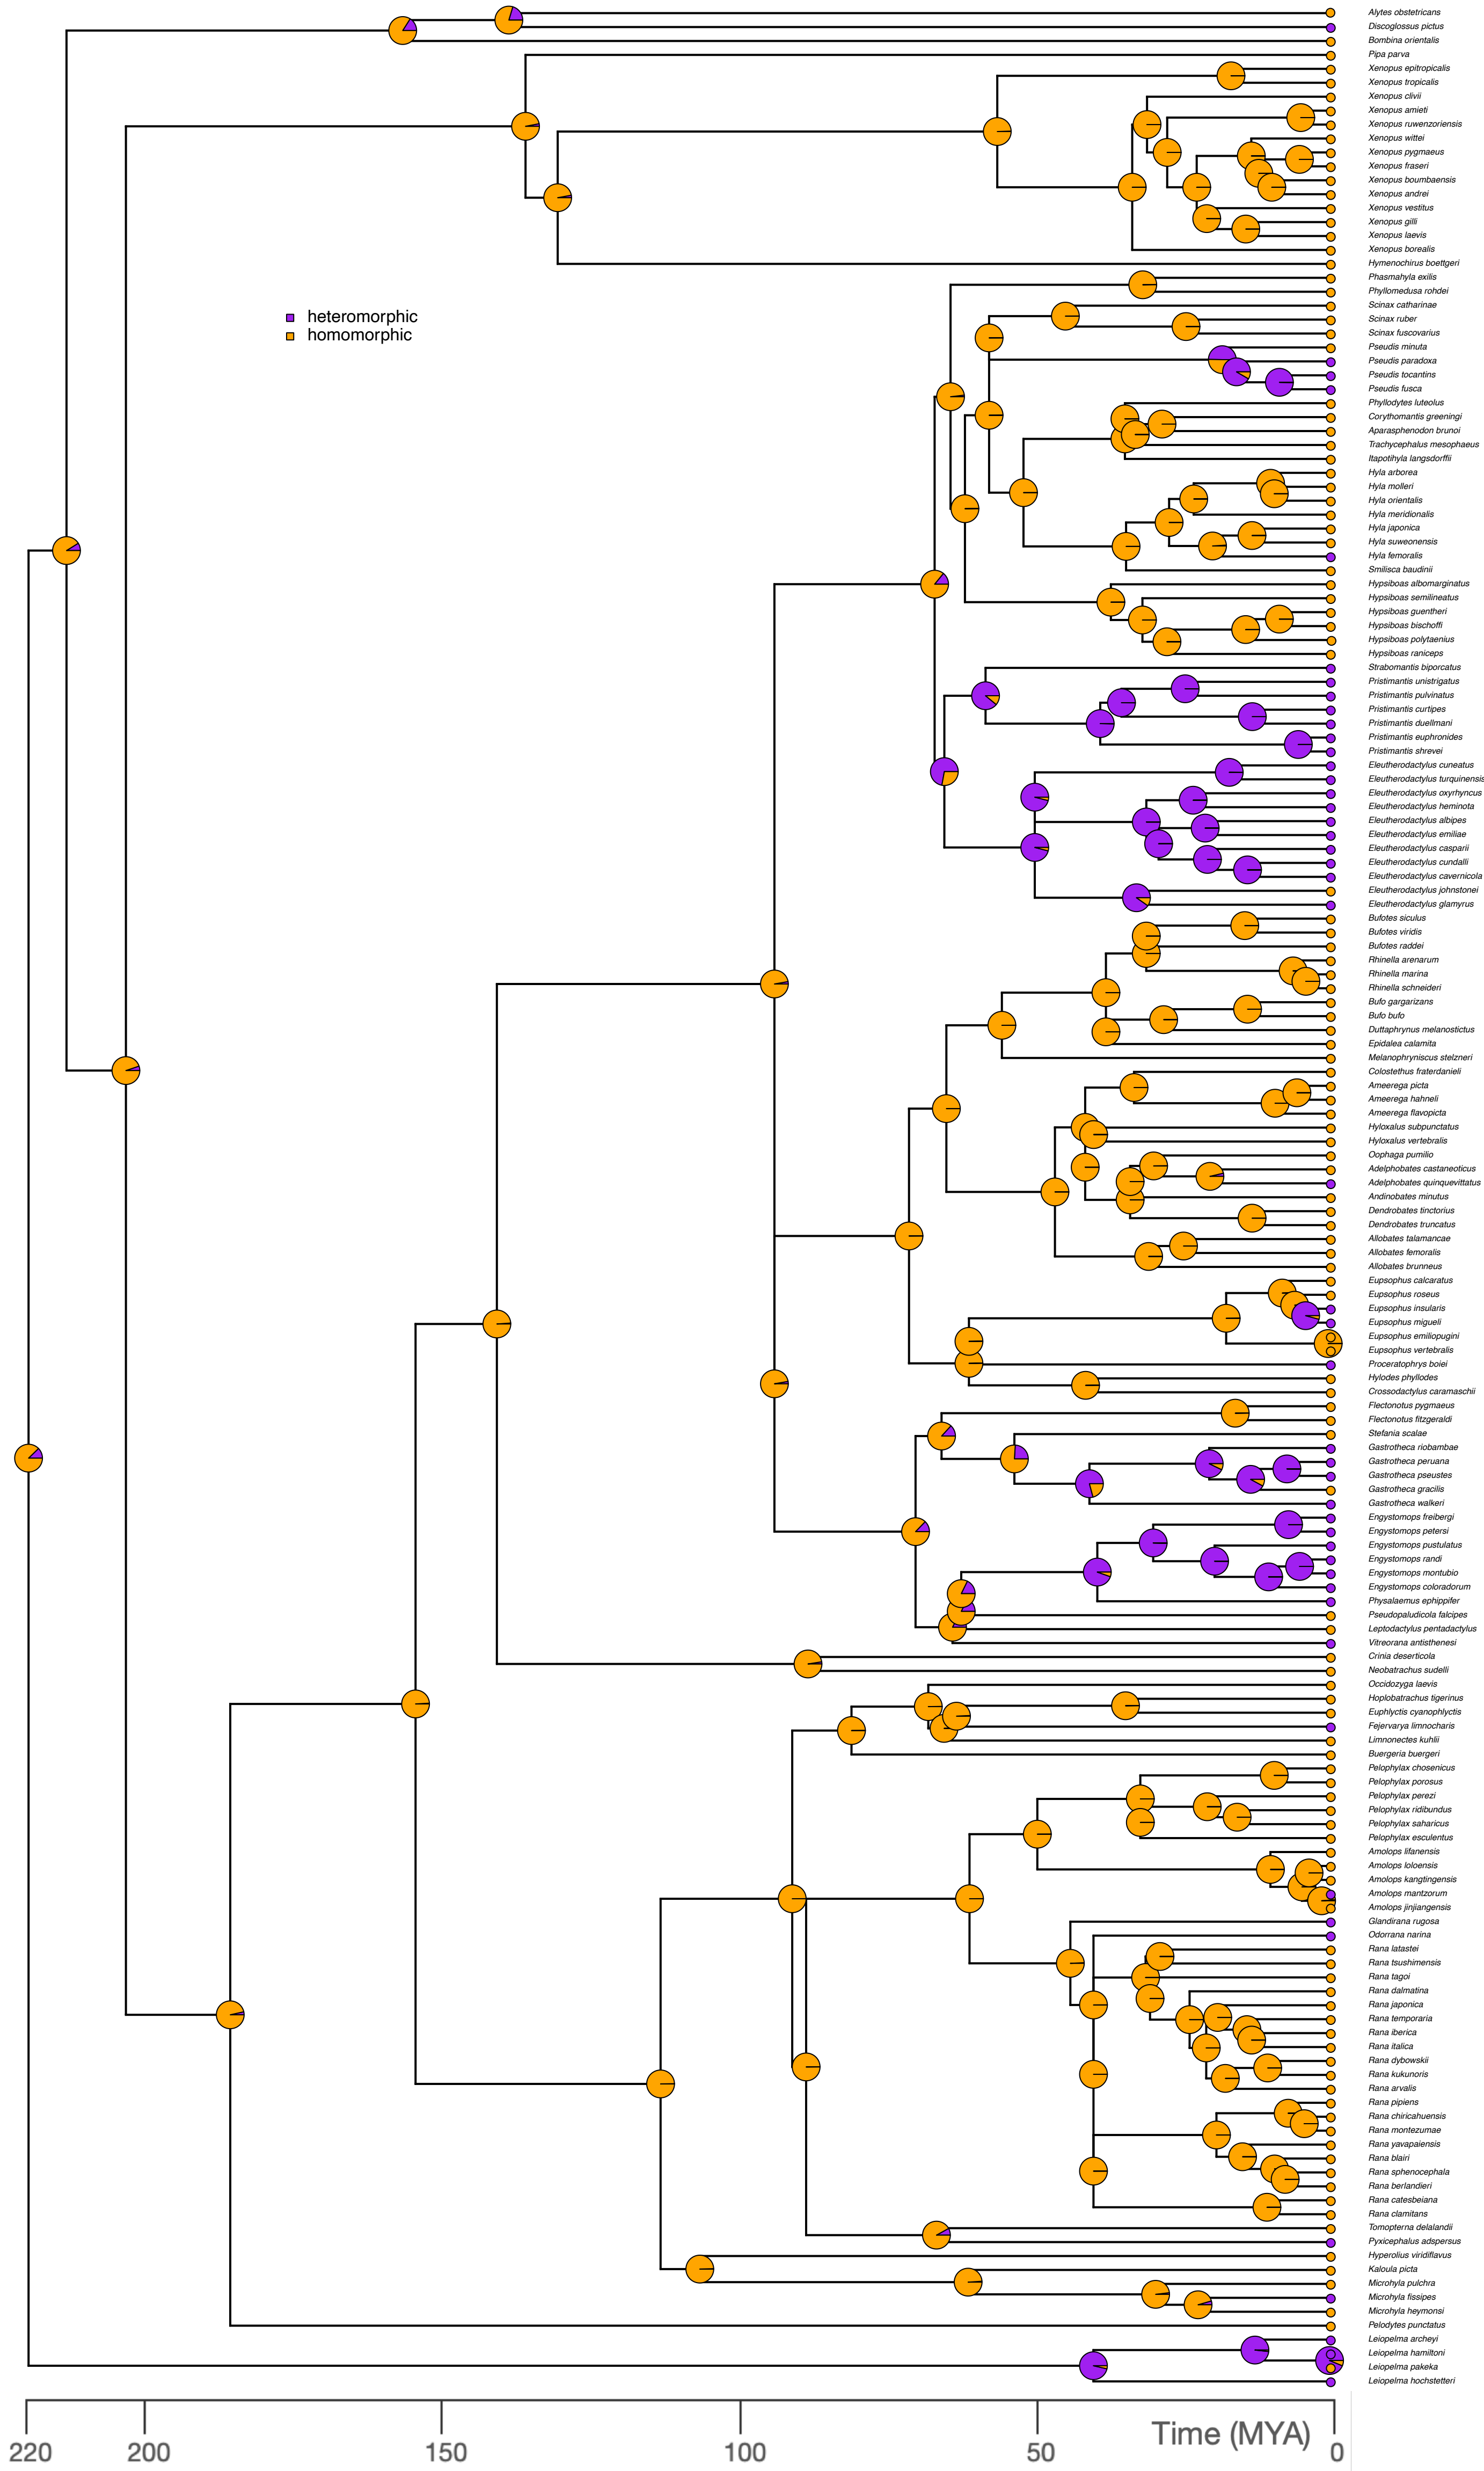

Supplement: s1 [file s1]
